# Supplementary material for: Identification of key candidate genes and pathways in endometrial cancer: Evidence from bioinformatics analysis
Source: PubMed Central journal article supplement — Oncol Lett. 2019 Nov 1;18(6):6679–89. doi: 10.3892/ol.2019.11040 (PMC6876294; doi:10.3892/ol.2019.11040), 2019-11-01
Supplement: Supplementary_Data.pdf [file Supplementary_Data.pdf]

Table SI. Clinicopathological features of 18 patients with gynecological cancer and of 17 women of the control group.

| Age (years) | Tissue type                | Pathology                                                          |
|-------------|----------------------------|--------------------------------------------------------------------|
| 49          | Cervical cancer            | Non-keratinizing invasive squamous cell carcinoma                  |
| 38          | Cervical cancer            | Mucinous adenocarcinoma                                            |
| 68          | Cervical cancer            | Squamous carcinoma                                                 |
| 55          | Cervical cancer            | Squamous carcinoma                                                 |
| 41          | Cervical cancer            | Squamous carcinoma                                                 |
| 52          | Cervical tissue control    | Benign ovarian cyst                                                |
| 45          | Cervical tissue control    | Fibroid                                                            |
| 52          | Cervical tissue control    | Benign ovarian cyst                                                |
| 45          | Cervical tissue control    | Fibroid                                                            |
| 64          | Cervical tissue control    | Benign ovarian cyst                                                |
| 39          | Endometrial cancer         | Endometrioid adenocarcinoma                                        |
| 69          | Endometrial cancer         | Endometrioid adenocarcinoma                                        |
| 52          | Endometrial cancer         | Mixed endometrioid adenocarcinoma and clear cell                   |
| 65          | Endometrial cancer         | Adenocarcinoma with squamous differentiation                       |
| 52          | Endometrial cancer         | Mixed endometrioid adenocarcinoma, clear cell and papillary serous |
| 42          | Endometrial cancer         | Adenocarcinoma with squamous differentiation                       |
| 69          | Endometrial cancer         | Mixed endometrioid adenocarcinoma and villoglandular               |
| 52          | Endometrial tissue control | Benign ovarian cyst                                                |
| 45          | Endometrial tissue control | Uterine myomas                                                     |
| 36          | Endometrial tissue control | Uterine myomas                                                     |
| 33          | Endometrial tissue control | Uterine myomas                                                     |
| 45          | Endometrial tissue control | Uterine myomas                                                     |
| 77          | Vulvar cancer              | Keratinized squamous                                               |
| 78          | Vulvar cancer              | Keratinized squamous                                               |
| 82          | Vulvar cancer              | Keratinized squamous (recurrent)                                   |
| 79          | Vulvar cancer              | Keratinized squamous                                               |
| 78          | Vulvar cancer              | Keratinized squamous                                               |
| 70          | Vulvar cancer              | Keratinized squamous                                               |
| 70          | Vulvar tissue control      | Uterine prolapse                                                   |
| 55          | Vulvar tissue control      | Uterine prolapse                                                   |
| 56          | Vulvar tissue control      | Uterine prolapse                                                   |
| 55          | Vulvar tissue control      | Uterine prolapse                                                   |
| 57          | Vulvar tissue control      | Uterine prolapse                                                   |
| 70          | Vulvar tissue control      | Uterine prolapse                                                   |
| 56          | Vulvar tissue control      | Uterine prolapse                                                   |
